# Supplementary material
Source: Springer Nature journal article supplement (http://www.springermedizin.de/resource/supplementary/13014_2013_1056_MOESM4_ESM.pdf/9635210)

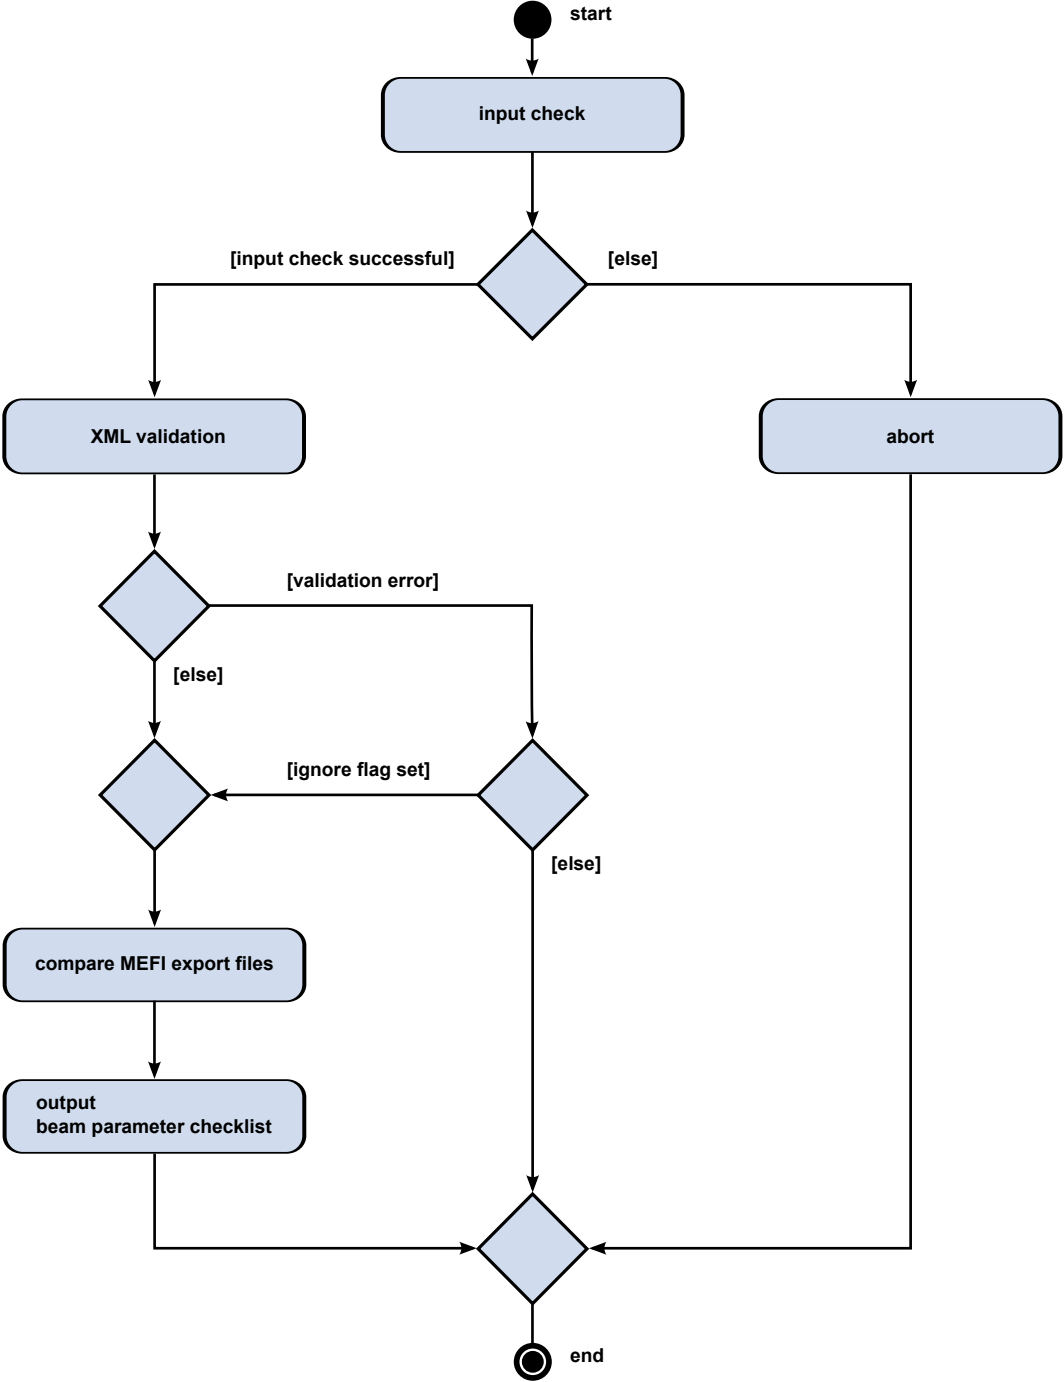

Supplement: MOESM4 [file 9635210]
